# Supplementary material for: The DNA damage and the DNA replication checkpoints converge at the MBF transcription factor
Source: PubMed Central journal article supplement — Mol Biol Cell. 2013 Nov 1;24(21):3350–7. doi: 10.1091/mbc.E13-05-0257 (PMC3814153; doi:10.1091/mbc.e13-05-0257), 2013-11-01

# Supplemental Materials

*Molecular Biology of the Cell*

Ivanova et al.

**SUPPLEMENTARY TABLE SI**

Strains used in this work

| <b>Strain</b> | <b>Genotype</b>                                            | <b>Origin</b>             |
|---------------|------------------------------------------------------------|---------------------------|
| 972           | h-                                                         | Lab stock                 |
| JA242         | cdc10-HA-kan+ leu1-32 h-                                   | This work                 |
| JA672         | chk1::ura4+ ura4-D18 h+                                    | This work                 |
| JA770         | cdc10-HA::nat+ leu1-32 h-                                  | This work                 |
| JA803         | cdc10-C4 h+                                                | Lab stock                 |
| JA974         | yox1S114-115A-13Myc-kan+ h-                                | Gomez-Escoda et al (2011) |
| JA977         | yox1-13Myc-kan+ nrm1-HA-nat+ h+                            | This work                 |
| JA1016        | nrm1::kan+ max1-13Myc-nat+ ura4-D18 h+                     | This work                 |
| JA1069        | rad3::nat+ cdc10-HA-kan+ h-                                | This work                 |
| JA1070        | cds1::kan+ cdc10-HA-nat+ leu1-32 h-                        | This work                 |
| JA1078        | cdc10-HA-nat+ yox1-S114A-T115A h+                          | This work                 |
| JA1089        | cdc10-HA-nat+ cds1::kan+ chk1::ura4+ ura4-D18 h+           | This work                 |
| JA1090        | cdc10-HA-nat+ chk1::ura4+ ura4-D18 h+                      | This work                 |
| JA1269        | cdc10-kan+ h-                                              | This work                 |
| JA1270        | cdc10-S3-kan+ h-                                           | This work                 |
| JA1271        | cdc10-S5-kan+ h-                                           | This work                 |
| JA1272        | cdc10-S3,S5-kan+ h-                                        | This work                 |
| JA1405        | chk1:9myc2HA6His:ura4+ cds1::kan+ ura4-D18 h+              | This work                 |
| JA1406        | chk1:9myc2HA6His:ura4+ yox1S114-115A-13Myc-kan ura4-D18 h+ | This work                 |
| JA1407        | chk1-HA-Kan+ h-                                            | This work                 |
| JA1408        | cdc10-S563A-kan h+                                         | This work                 |
| JA1409        | cdc10-T603A-kan h-                                         | This work                 |
| JA1411        | yox1::ble+ nrm1::nat+ h+                                   | This work                 |
| JA1413        | yox1::ble+ nrm1::nat+ cdc10-S3A-kan+ h-                    | This work                 |
| JA1414        | yox1::ble+ nrm1::nat+ cdc10-S5A-kan+ h-                    | This work                 |
| JA1415        | yox1::ble+ nrm1::nat+ cdc10-S3,S5-kan+ h-                  | This work                 |
| JA1573        | chk1:9myc2HA6His:ura4+ cdc10-HA-kan+ ura4-D18 h?           | This work                 |
| JA1672        | res1-HA:nat+ h-                                            | This work                 |
| JA1673        | res2-HA:nat+ h-                                            | This work                 |
| LLD3427       | chk1:9myc2HA6His:ura4+ ura4-D18 leu1-32 h-                 | Furnary et al (1997)      |

## SUPPLEMENTARY METHODS

**FACS.** For cell cycle progression, *S.pombe* strains were grown in liquid MM or YE5S media to an OD<sub>600</sub> of 0.5 and the cultures were treated with the corresponding MMS concentration for the indicated time. ~5×10<sup>6</sup> cells for each sample were fixed in 70% ethanol, washed with 1ml 50 mM Sodium citrate (pH 7), resuspended in 0.5ml of the same buffer with 100 µg/ml RNase and incubated overnight at 37°C. DNA was stained with 1 µg/ml of propidium iodide, mixed vigorously and sonicated. To determine cell viability, *S. pombe* strains were grown in liquid MM or YE5S media to an OD<sub>600</sub> of 0.5 and the cultures were treated with the corresponding MMS concentration for the indicated time. Cells were then washed, diluted in YE5S and spotted onto YE5S media agar plates. Plates were incubated at 30°C for 3–4 days.

## **SUPPLEMENTARY FIGURE LEGENDS**

**Supplementary Figure S1.** Wild type (WT) and  $\Delta chk1$  cells were treated with the indicated concentration of MMS for 1h. Viability was measured by spotting  $10^0$  to  $10^5$  cells onto YE5S plates and incubated at 30°C for 3-4 days.

**Supplementary Figure S2. Yox1 binds MBF through the C-terminal region of Cdc10.** Loading of Yox1 on *cdc22* and *cdc18* promoters was measured in untreated or MMS-treated (0.1% MMS, 1h at 25°C) cultures of WT and *Cdc10-C4* strain by ChIP. The average of three individual experiments ( $\pm$ s.d.) is plotted.

**Supplementary Figure S3. Phosphorylation of S563 and T603 do not affect Cdc10 promoter binding after DNA damage.** Loading of Cdc10 on *cdc22* and *cdc18* promoters was measured in untreated or MMS-treated (0.1% MMS, 1h at 25°C) cultures of wild type (WT), *Cdc10.S563A* and *Cdc10.T603A* strains by ChIP. The average of three individual experiments ( $\pm$ s.d.) is plotted.

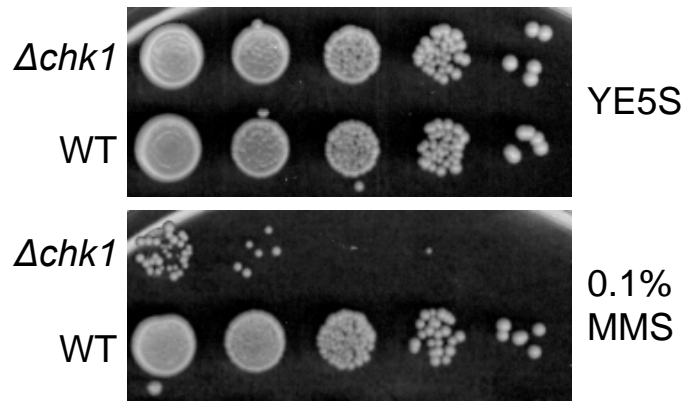

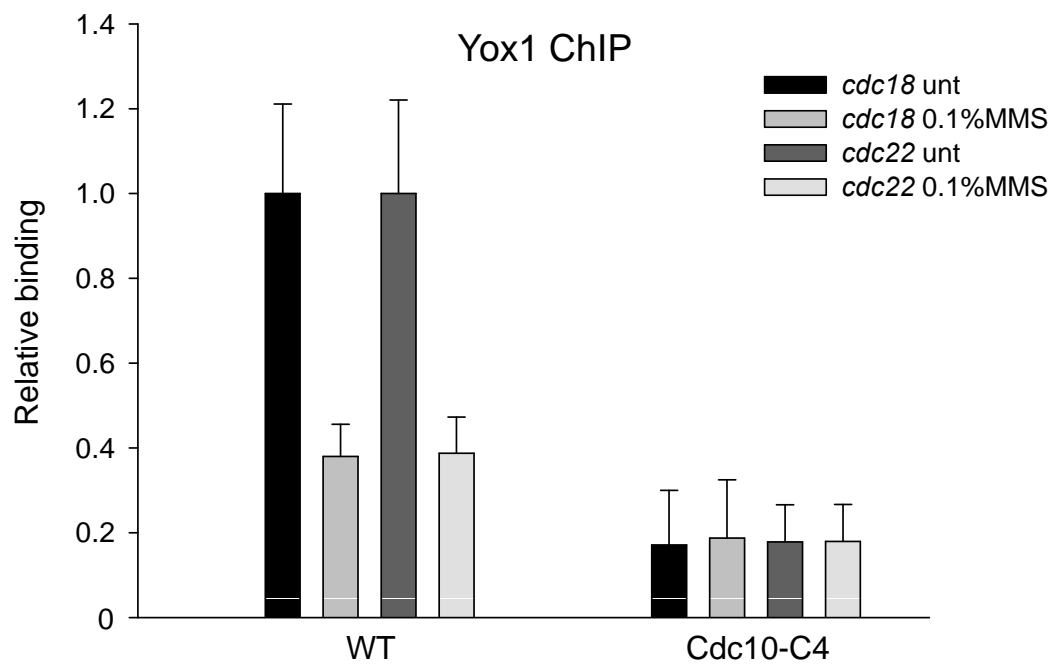

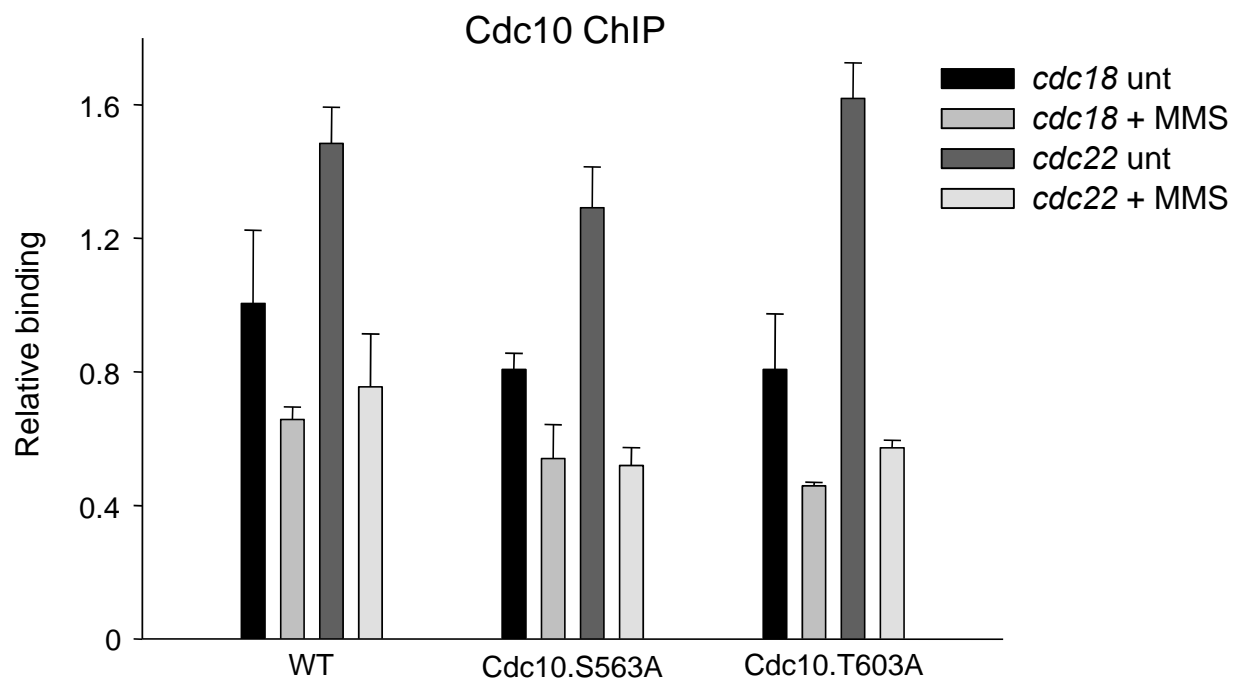

Supplement: supp_E13-05-0257_CombinedSupMats.pdf [file supp_E13-05-0257_CombinedSupMats.pdf]
